# Supplementary material
Source: publisher figshare collection journal article supplement (https://tandf.figshare.com/articles/dataset/_/5563132)
Supplement: Supplementary file 1 [file 2]

Fig S1. The barplot shows the percentage of average food consumption of 10 males over 24h for each treatment group, including BS-13 (flies that received the suspension containing the gut microbiota of flies developed at 13°C), BS-23 (flies that received the suspension containing the gut microbiota of flies developed at 23°C), BS-31 (flies that received the suspension containing the gut microbiota of flies developed at 31 °C) and FBS-suc (flies that received a sucrose suspension without bacteria). Error bars indicate the standard error of the mean.
